# Supplementary material
Source: ML conference proceedings conference paper supplement (https://openreview.net/forum?id=VPX0ln_YoG)

Accuracy on fmnist

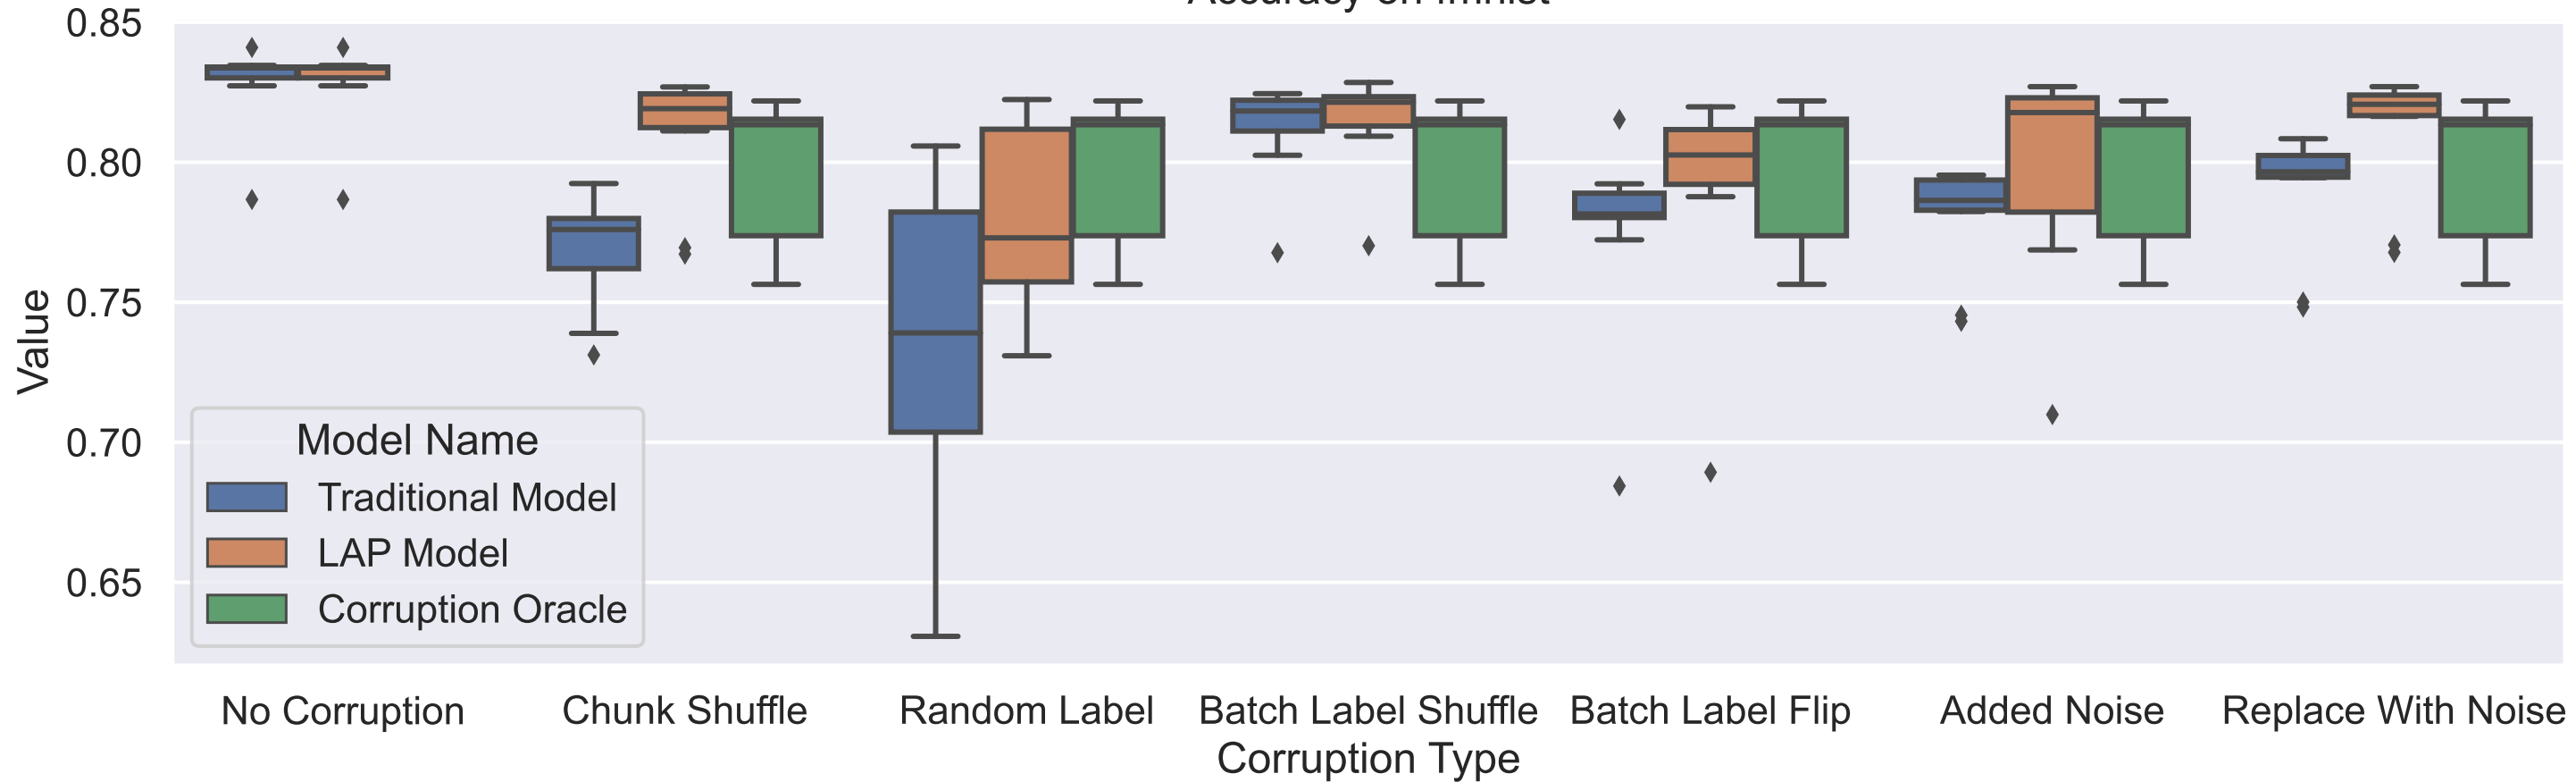

Supplement: supplementary_material [file attachment]

Accuracy on cifar10

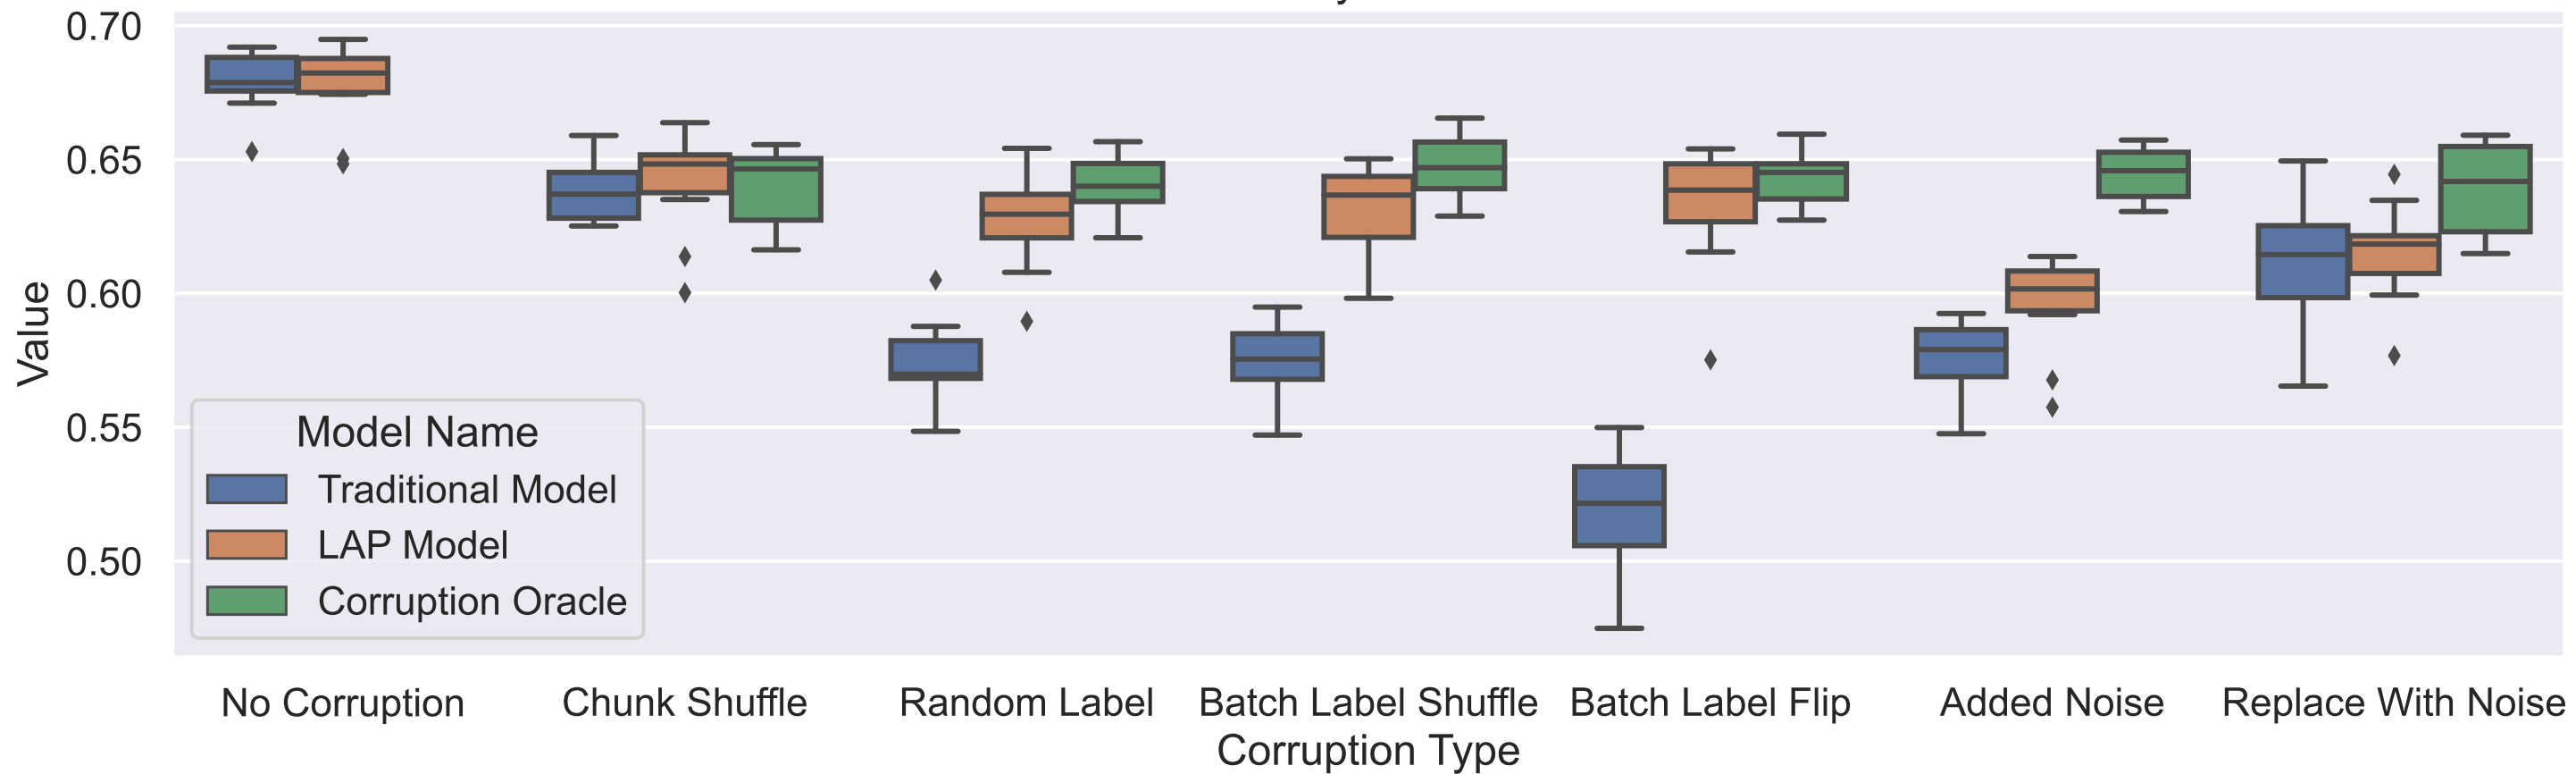

Supplement: supplementary_material [file attachment]

Accuracy on cifar100

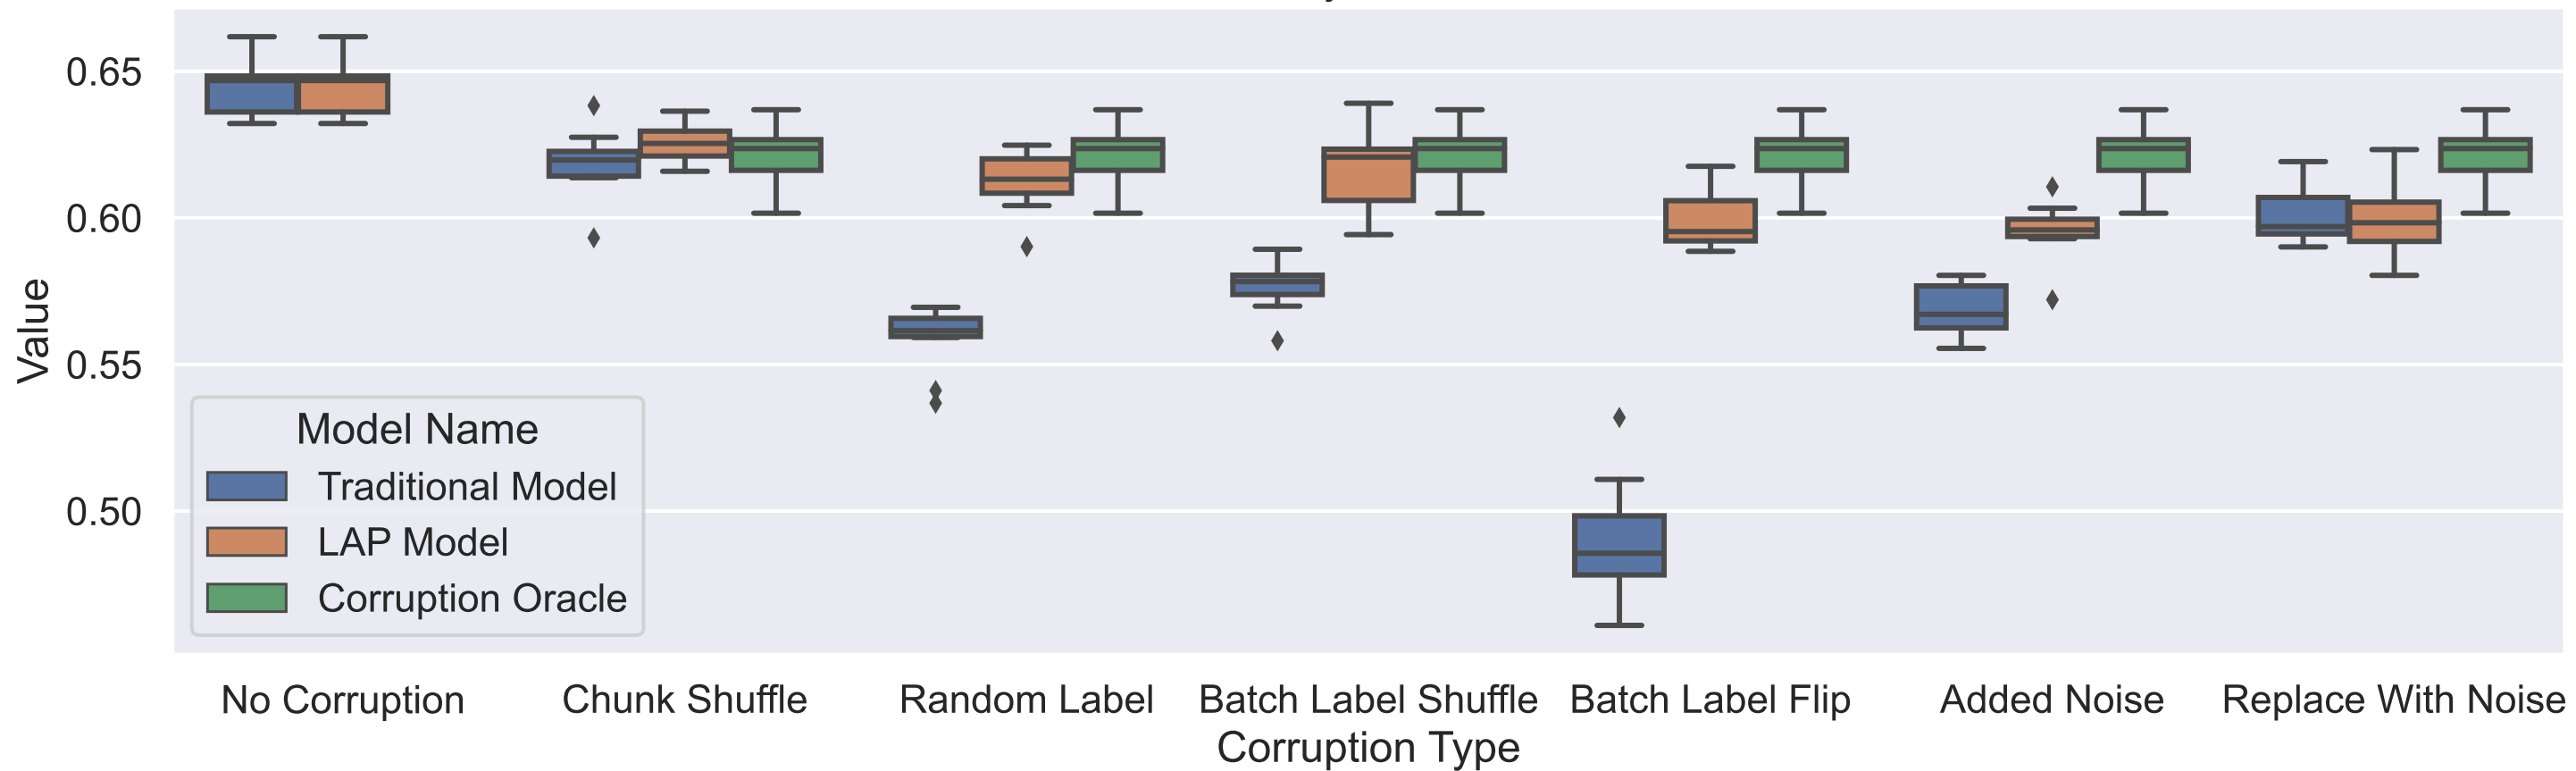

Supplement: supplementary_material [file attachment]
